# Supplementary material for: Impact of postanesthesia care unit delirium on self-reported cognitive function and perceived health status: a prospective observational cohort study
Source: Springer Nature journal article supplement (doi:10.1007/s11136-022-03087-1), 2022-01-27
Supplement: MOESM1 [file 20074002]

*Title:* Impact of postanesthesia care unit delirium on self-reported cognitive function and perceived health status: a prospective observational cohort study

*Journal name:* Quality of Life Research

*Author names:* Elena Kainz, Karin Stuff, Ursula Kahl, Christian Wiessner, Yuanyuan Yu, Franziska von Breunig, Rainer Nitzschke, Alexander Haese, Markus Graefen, Marlene Fischer.

*Corresponding author:* Marlene Fischer, University Medical Center Hamburg-Eppendorf, Department of Anesthesiology, Department of Intensive Care Medicine, Martinistrasse 52, 20246 Hamburg, Germany. Email: mar.fischer@uke.de

### **Supplementary file 1: Assessments throughout the study period.**

#### **Preoperative assessments and baseline scores**

- MMSE: cognitive impairment
- PHQ-9: depressive symptoms
- CFQ: cognitive failures
- CRI: cognitive reserve

#### **Screening for PACU delirium**

- RASS: agitation and sedation
- CAM-ICU: PACU delirium screening
- Numerical Rating Scale: pain

#### **3-month follow-up**

- CFQ: cognitive failures
- SF-36: perceived health status

Supplementary file 1: Assessments throughout the study period. MMSE: Mini-Mental Status Examination. PHQ-9: Patient Health Questionnaire-9. CFQ: Cognitive Failures Questionnaire. CRI: Cognitive Reserve Index. PACU: postanesthesia care unit. RASS: Richmond Agitation and Sedation Scale. SF-36: 36-item Short Form Health Survey.
