# Supplementary material for: Impact of postanesthesia care unit delirium on self-reported cognitive function and perceived health status: a prospective observational cohort study
Source: Springer Nature journal article supplement (doi:10.1007/s11136-022-03087-1), 2022-01-27
Supplement: MOESM3 [file 20074002]

*Title:* Impact of postanesthesia care unit delirium on self-reported cognitive function and perceived health status: a prospective observational cohort study

*Journal name:* Quality of Life Research

*Author names:* Elena Kainz, Karin Stuff, Ursula Kahl, Christian Wiessner, Yuanyuan Yu, Franziska von Breunig, Rainer Nitzschke, Alexander Haese, Markus Graefen, Marlene Fischer.

*Corresponding author:* Marlene Fischer, University Medical Center Hamburg-Eppendorf, Department of Anesthesiology, Department of Intensive Care Medicine, Martinistrasse 52, 20246 Hamburg, Germany. Email: mar.fischer@uke.de

**Supplementary file 3: Baseline demographic, clinical, and psychometric characteristics stratified by response status.**

|                                           | <b>Non-responder<br/>n=32</b> | <b>CFQ or SF-36<br/>n=12</b> | <b>CFQ and SF-36<br/>n=178</b> |
|-------------------------------------------|-------------------------------|------------------------------|--------------------------------|
| PACU delirium                             | 8 (25.00)                     | 2 (16.70)                    | 62 (34.80)                     |
| Age (years)                               | 68 (63-70)                    | 70 (69-73)                   | 67 (64-71)                     |
| BMI (kg/m <sup>2</sup> )                  | 25 (24.4-28.2)                | 25.3 (24.3-25.8)             | 25.8 (24.4-27.8)               |
| ASA physical status classification system |                               |                              |                                |
| ASA I                                     | 3 (9.40)                      | 0 (0.00)                     | 18 (10.10)                     |
| ASA II                                    | 25 (78.10)                    | 11 (91.70)                   | 142 (79.80)                    |
| ASA III                                   | 4 (12.50)                     | 1 (8.30)                     | 18 (10.10)                     |
| Obesity (BMI ≥ 30)                        | 2 (6.30)                      | 1 (8.30)                     | 20 (11.20)                     |
| Arterial hypertension                     | 15 (46.90)                    | 7 (58.30)                    | 102 (57.30)                    |
| Coronary heart disease                    | 3 (9.40)                      | 1 (8.30)                     | 17 (9.60)                      |
| Diabetes/prediabetes                      | 3 (9.40)                      | 0 (0.00)                     | 16 (9.00)                      |
| Dyslipoproteinemia                        | 8 (25.00)                     | 5 (41.70)                    | 45 (25.30)                     |
| COPD                                      | 1 (3.10)                      | 0 (0.00)                     | 4 (2.20)                       |
| Current smoking status                    | 3 (9.40)                      | 0 (0.00)                     | 14 (7.90)                      |
| RARP                                      | 19 (59.40)                    | 5 (41.70)                    | 91 (51.10)                     |
| ORP                                       | 13 (40.60)                    | 7 (58.30)                    | 87 (48.90)                     |
| Duration of surgery (min)                 | 175 (153-195)                 | 175 (155-203)                | 175 (150-195)                  |
| Duration of anesthesia (min)              | 240 (225-278)                 | 250 (230-278)                | 245 (225-270)                  |
| Sufentanil (total amount, µg)             | 83 (74-93)                    | 83 (70-98)                   | 90 (75-100)                    |

|                                               |                   |                    |                  |
|-----------------------------------------------|-------------------|--------------------|------------------|
| Noradrenaline ( $\mu\text{g}$ per kg per min) | 0.06 (0.03-0.07)  | 0.05 (0.04-0.09)   | 0.06 (0.03-0.09) |
| Estimated blood loss (ml)                     | 450 (225-650)     | 575 (300-850)      | 450 (250-750)    |
| Fluids (ml per min)                           | 10.24 (8.7-11.32) | 10.47 (9.81-12.15) | 10.2 (8.33-12.1) |
| Length of PACU stay (min)                     | 180 (143-205)     | 178 (125-193)      | 170 (140-210)    |
| Piritramide (total amount, mg)                | 5.6 (0-7.5)       | 7.5 (0-7.5)        | 5.5 (0-7.5)      |
| Atropin (administered)                        | 1 (3.10)          | 2 (16.70)          | 25 (14.00)       |
| MMSE                                          | 30 (29-30)        | 30 (29-30)         | 30 (29-30)       |
| PHQ-9                                         | 2 (1-7)           | 1 (0-2)            | 2 (1-4)          |
| CRI education                                 | 116 (102-125)     | 116 (104-130)      | 113 (102-128)    |
| CRI working activity                          | 123 (109-138)     | 129 (125-131)      | 123 (110-132)    |
| CRI leisure time                              | 119 (109-138)     | 131 (118-142)      | 126 (114-139)    |
| CRI total                                     | 129 (110-142)     | 130 (125-142)      | 128 (117-141)    |
| CFQ preoperative sum score                    | 16 (10-24)        | 12 (10-15)         | 16 (10-22)       |
| CFQ preoperative forgetfulness                | 8 (6-11)          | 8 (7-9)            | 9 (6-11)         |
| CFQ preoperative distractibility              | 6 (1-5)           | 4 (2-5)            | 5 (2-7)          |
| CFQ preoperative false triggering             | 3 (1-5)           | 2 (0-3)            | 2 (1-4)          |

Supplementary file 3. PACU: postanesthesia care unit. ASA: American Society of Anesthesiologists. COPD: chronic obstructive pulmonary disease. RARP: robot-assisted radical prostatectomy. ORP: open radical retropubic prostatectomy. BMI: body mass index. MMSE: Mini-Mental Status Examination. PHQ-9: Patient Health Questionnaire-9. CRI: Cognitive Reserve Index. CFQ: Cognitive Failures Questionnaire. Continuous variables are presented as median with interquartile range. Categorical variables are presented as absolute and relative number.
