# Supplementary material for: Impact of postanesthesia care unit delirium on self-reported cognitive function and perceived health status: a prospective observational cohort study
Source: Springer Nature journal article supplement (doi:10.1007/s11136-022-03087-1), 2022-01-27
Supplement: MOESM4 [file 20074002]

*Title:* Impact of postanesthesia care unit delirium on self-reported cognitive function and perceived health status: a prospective observational cohort study

*Journal name:* Quality of Life Research

*Author names:* Elena Kainz, Karin Stuff, Ursula Kahl, Christian Wiessner, Yuanyuan Yu, Franziska von Breunig, Rainer Nitzschke, Alexander Haese, Markus Graefen, Marlene Fischer.

*Corresponding author:* Marlene Fischer, University Medical Center Hamburg-Eppendorf, Department of Anesthesiology, Department of Intensive Care Medicine, Martinistrasse 52, 20246 Hamburg, Germany. Email: mar.fischer@uke.de

#### **Supplementary file 4: Laboratory parameters.**

|                                                    | <b>no PACU-delirium<br/>n=150</b> | <b>PACU-delirium<br/>n=72</b> | <b><i>p</i></b> |
|----------------------------------------------------|-----------------------------------|-------------------------------|-----------------|
| Hemoglobin <sub>preoperative</sub> (g/dl)          | 14.3 (13.7-15.1)                  | 14.4 (13.5-15.1)              | 0.941           |
| Hemoglobin <sub>postoperative</sub> (g/dl)         | 11.4 (10.8-12.3)                  | 11.5 (10.8-12.3)              | 0.972           |
| $\Delta$ hemoglobin (g/dl)                         | 2.7 (2.3-3.3)                     | 2.7 (2.3-3.5)                 | 0.800           |
| Sodium <sub>postoperative</sub> (mmol/l)           | 140 (139-141)                     | 140 (139-142)                 | 0.327           |
| Potassium <sub>postoperative</sub> (mmol/l)        | 4.1 (3.9-4.2)                     | 4 (3.8-4.2)                   | 0.165           |
| Creatinine <sub>preoperative</sub> (mg/dl)         | 1 (0.91-1.1)                      | 0.94 (0.85-1)                 | 0.003           |
| Creatinine <sub>postoperative</sub> (mg/dl)        | 0.89 (0.81-0.99)                  | 0.84 (0.75-0.94)              | 0.004           |
| $\Delta$ creatinine (mg/dl)                        | 0.1 (0.03-0.17)                   | 0.11 (0.02-0.16)              | 0.782           |
| C-reactive protein <sub>postoperative</sub> (mg/l) | 42 (29-55)                        | 43 (33-57)                    | 0.433           |
| White blood cells <sub>postoperative</sub> (G/l)   | 9.4 (7.4-11.3)                    | 101 (8-12.6)                  | 0.118           |

Supplementary file 4. PACU: postanesthesia care unit. Variables are presented as median with interquartile range.  $\Delta$  refers to the difference between pre- and postoperative serum levels.
