# Supplementary material for: Impact of postanesthesia care unit delirium on self-reported cognitive function and perceived health status: a prospective observational cohort study
Source: Springer Nature journal article supplement (doi:10.1007/s11136-022-03087-1), 2022-01-27
Supplement: MOESM5 [file 20074002]

*Title:* Impact of postanesthesia care unit delirium on self-reported cognitive function and perceived health status: a prospective observational cohort study

*Journal name:* Quality of Life Research

*Author names:* Elena Kainz, Karin Stuff, Ursula Kahl, Christian Wiessner, Yuanyuan Yu, Franziska von Breunig, Rainer Nitzschke, Alexander Haese, Markus Graefen, Marlene Fischer.

*Corresponding author:* Marlene Fischer, University Medical Center Hamburg-Eppendorf, Department of Anesthesiology, Department of Intensive Care Medicine, Martinistrasse 52, 20246 Hamburg, Germany. Email: mar.fischer@uke.de

**Supplementary file 5: Subgroup analyses of PACU delirium duration on cognitive failures and SF-36 physical and mental component scores at 3 months**

|                                           | <b>Parameter<br/>Estimate</b> | <b>95% CI</b>  | <b>p</b> |
|-------------------------------------------|-------------------------------|----------------|----------|
| <b>CFQ</b>                                |                               |                |          |
| Age → PACU duration                       | 0.16                          | [0.04; 0.28]   | 0.011    |
| ASA II → PACU duration                    | 1.31                          | [-0.45; 3.07]  | 0.144    |
| ASA III → PACU duration                   | 3.06                          | [0.38; 5.75]   | 0.025    |
| PACU duration → CFQ                       | 1.13                          | [-2.57; 4.83]  | 0.550    |
| Age → CFQ                                 | -0.05                         | [-0.45; 0.34]  | 0.788    |
| CFQ (preoperative) → CFQ                  | 1.04                          | [0.80; 1.28]   | <0.001   |
| PHQ-9 → CFQ                               | 0.18                          | [-0.48; 0.85]  | 0.587    |
| Additive Therapy → CFQ                    | 1.79                          | [-2.23; 5.81]  | 0.383    |
| PHQ-9 → CFQ (preoperative)                | 0.93                          | [0.40; 1.46]   | 0.001    |
| <b>SF-36 physical component score</b>     |                               |                |          |
| Age → PACU duration                       | 0.16                          | [0.04; 0.28]   | 0.011    |
| ASA II → PACU duration                    | 1.31                          | [-0.45; 3.07]  | 0.144    |
| ASA III → PACU duration                   | 3.06                          | [0.38; 5.75]   | 0.025    |
| PACU duration → SF-36 physical            | 0.21                          | [-0.07; 0.48]  | 0.136    |
| Age → SF-36 physical                      | -0.03                         | [-0.07; -0.00] | 0.026    |
| Bilateral nerve-sparing → SF-36 physical  | -0.37                         | [-0.88; 0.14]  | 0.151    |
| Unilateral nerve-sparing → SF-36 physical | 0.19                          | [-0.36; 0.75]  | 0.499    |
| Surgical technique → SF-36 physical       | -0.22                         | [-0.50; 0.05]  | 0.106    |
| Additive Therapy → SF-36 physical         | 0.27                          | [-0.07; 0.61]  | 0.122    |
| <b>SF-36 mental component score</b>       |                               |                |          |

|                                         |       |               |        |
|-----------------------------------------|-------|---------------|--------|
| Age → PACU duration                     | 0.16  | [0.04; 0.28]  | 0.011  |
| ASA II → PACU duration                  | 1.31  | [-0.45; 3.07] | 0.144  |
| ASA III → PACU duration                 | 3.06  | [0.38; 5.75]  | 0.025  |
| PACU duration → SF-36 mental            | 0.02  | [-0.22; 0.25] | 0.899  |
| Age → SF-36 mental                      | 0.01  | [-0.02; 0.03] | 0.578  |
| Bilateral nerve-sparing → SF-36 mental  | 0.05  | [-0.39; 0.48] | 0.836  |
| Unilateral nerve-sparing → SF-36 mental | -0.06 | [-0.53; 0.41] | 0.800  |
| Additive Therapy → SF-36 mental         | 0.18  | [-0.10; 0.46] | 0.215  |
| PHQ-9 → SF-36 mental                    | 0.08  | [0.04; 0.12]  | <0.001 |

Supplementary file 5. Associations of PACU delirium duration on outcome measures.

Following subgroups were defined to define delirium duration: (1) patients who were delirious at least at one of delirium assessment points 2-4 (30, 45 or 60 minutes after arriving in the PACU; n=35) and (2) patients with delirium only fifteen minutes after arriving in the PACU (n=37). CFQ: Cognitive Failures Questionnaire. PACU: postanesthesia care unit.

PHQ-9: Patient Health Questionnaire-9. ASA: American Society of Anesthesiologists. SF-36: 36-item Short Form Health survey.
